# Supplementary material for: Correction: Imputation-Based Population Genetics Analysis of Plasmodium falciparum Malaria Parasites
Source: PubMed Central journal article supplement (PMC5006977; doi:10.1371/journal.pgen.1006300), 2016-08-31
Supplement: pgen.1006300.s001.pdf [file pgen.1006300.s001.pdf]

## A IMPUTE

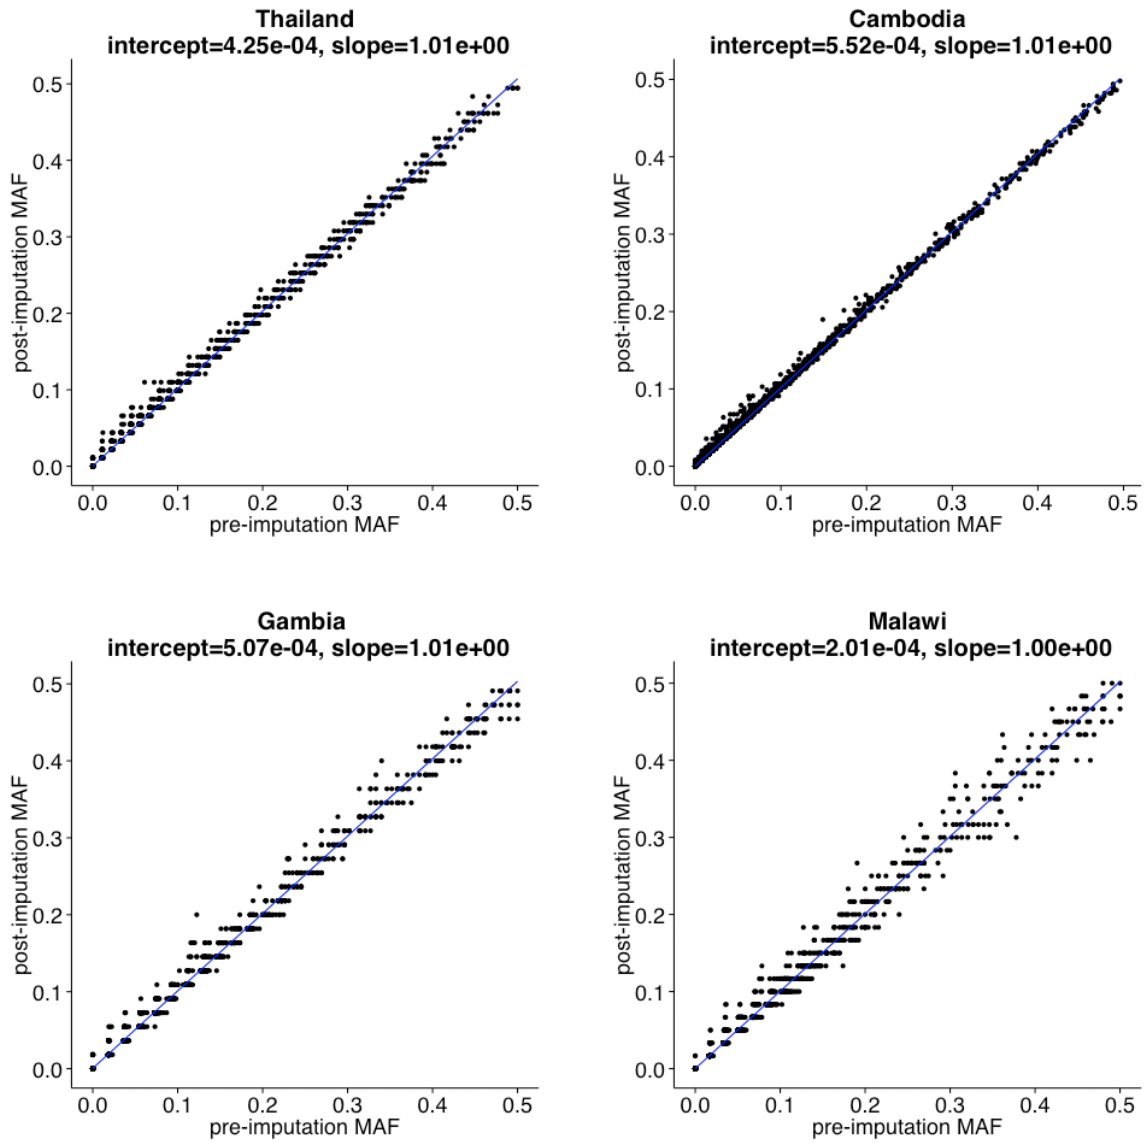

**S. Figure 2A.** MAF of a sample of 5,000 SNPs in each population pre-and post-imputation, using IMPUTE (recombination map: LDhat, reference panel: population-specific). No systematic increase or decrease was detected.

## B Beagle

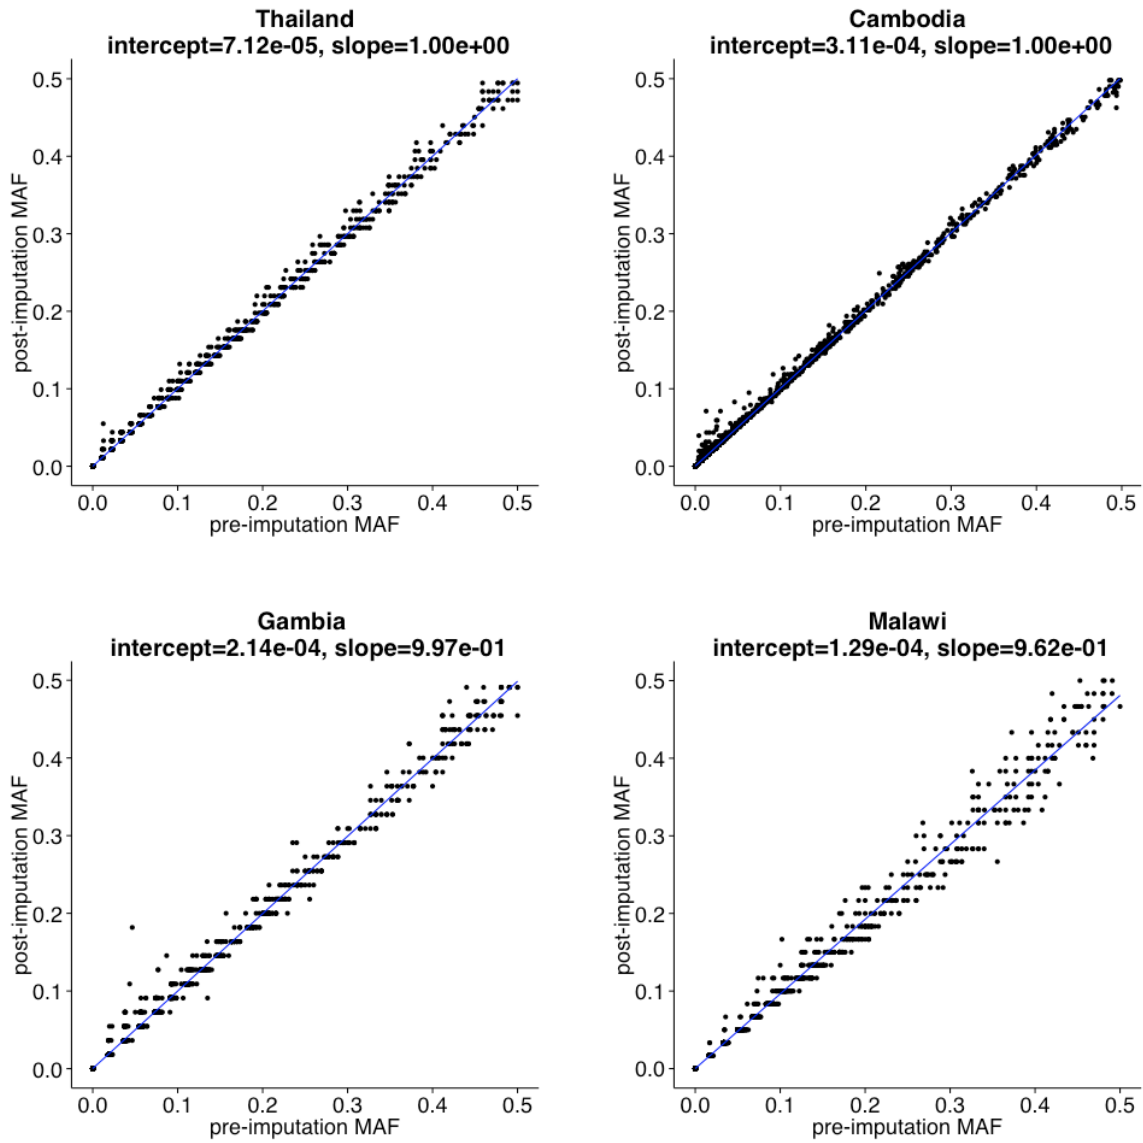

**S. Figure 2B.** MAF of a sample of 5,000 SNPs in each population pre-and post-imputation, using Beagle. No systematic increase or decrease was detected.
