# Supplementary material for: Correction: Imputation-Based Population Genetics Analysis of Plasmodium falciparum Malaria Parasites
Source: PubMed Central journal article supplement (PMC5006977; doi:10.1371/journal.pgen.1006300), 2016-08-31
Supplement: pgen.1006300.s002.pdf [file pgen.1006300.s002.pdf]

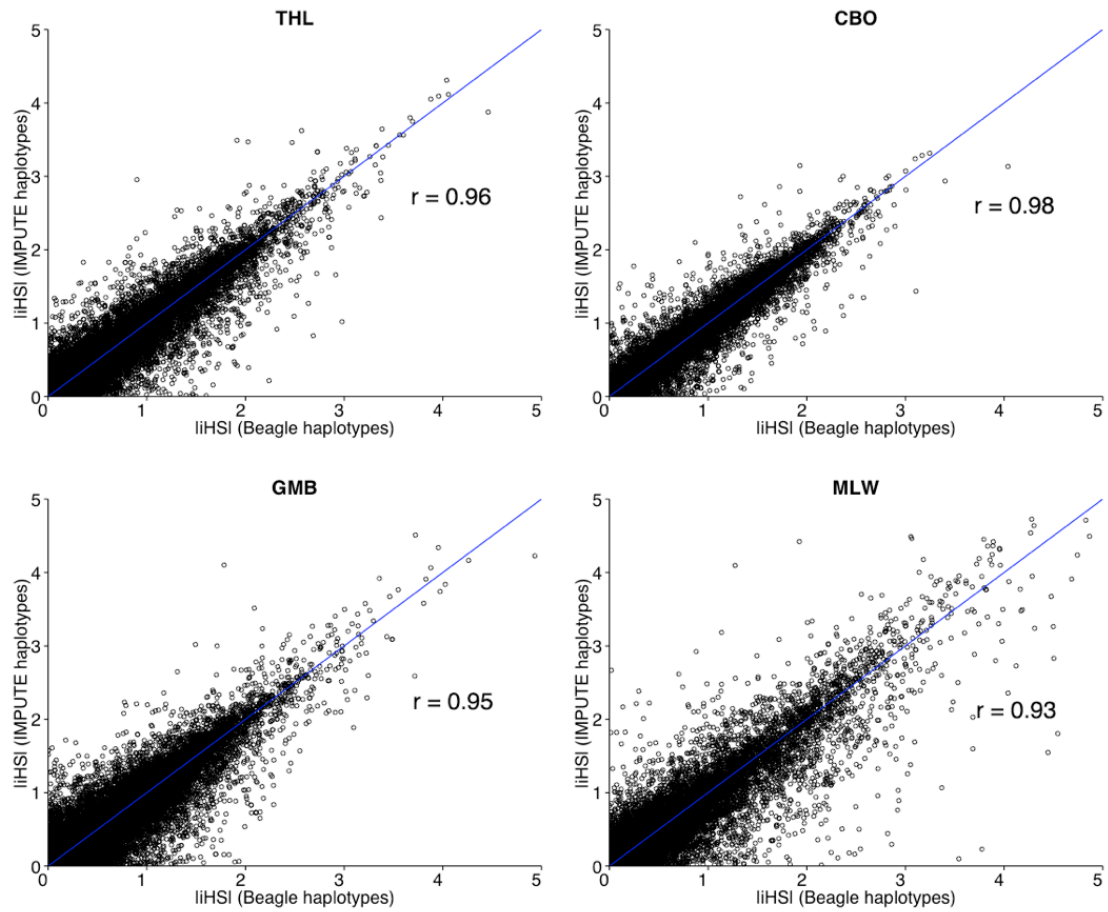

**S. Figure 3.** Pearson's correlation ( $r$ ) between  $|iHS|$  metrics calculated from Beagle- or IMPUTE-imputed genotypes. Diagonal line indicates line of equality.
